# Supplementary material for: Soft phonon modes lead to suppressed thermal conductivity in Ag-based chalcopyrites under high pressure
Source: Royal Society of Chemistry journal article supplement (doi:10.1039/d3cp03087c), 2023-01-01
Supplement: d3cp03087c1.pdf [file d3cp03087c1.pdf]

# Soft Phonon Modes Lead to Suppressed Thermal Conductivity in Ag-Based Chalcopyrites under High Pressure

Kunpeng Yuan<sup>1</sup>, Xiaoliang Zhang<sup>2\*</sup>, Yufei Gao<sup>2</sup>, Dawei Tang<sup>2\*</sup>

<sup>1</sup>*College of New Energy, China University of Petroleum (East China), Qingdao 266580, China.*

<sup>2</sup>*Key Laboratory of Ocean Energy Utilization and Energy Conservation of Ministry of Education, School of Energy and Power Engineering, Dalian University of Technology, Dalian 116024, China.*

\*Corresponding author. [zhangxiaoliang@dlut.edu.cn](mailto:zhangxiaoliang@dlut.edu.cn) (X.Z.); [dwtang@dlut.edu.cn](mailto:dwtang@dlut.edu.cn) (D.T.)

**Table S1.** Calculated lattice constants compared with experimental values.<sup>1</sup>

|                     | Pressure | This work    |              | Experiment   |              |
|---------------------|----------|--------------|--------------|--------------|--------------|
|                     |          | <i>a</i> (Å) | <i>c</i> (Å) | <i>a</i> (Å) | <i>c</i> (Å) |
| AgAlS <sub>2</sub>  | 0 GPa    | 5.63         | 10.44        | 5.69         | 10.24        |
|                     | 3 GPa    | 5.57         | 10.28        |              |              |
| AgAlSe <sub>2</sub> | 0 GPa    | 5.91         | 11.03        | 5.95         | 10.71        |
|                     | 3 GPa    | 5.84         | 10.82        |              |              |
| AgAlTe <sub>2</sub> | 0 GPa    | 6.28         | 12.12        | 6.29         | 11.83        |
|                     | 3 GPa    | 6.18         | 11.88        |              |              |
| AgGaS <sub>2</sub>  | 0 GPa    | 5.65         | 10.49        | 5.74         | 10.27        |
|                     | 3 GPa    | 5.59         | 10.30        |              |              |
| AgGaSe <sub>2</sub> | 0 GPa    | 5.91         | 11.10        | 5.97         | 10.87        |
|                     | 3 GPa    | 5.85         | 10.87        |              |              |
| AgGaTe <sub>2</sub> | 0 GPa    | 6.27         | 12.13        | 6.29         | 11.95        |
|                     | 3 GPa    | 6.16         | 11.88        |              |              |
| AgInS <sub>2</sub>  | 0 GPa    | 5.80         | 11.33        | 5.81         | 11.16        |
|                     | 3 GPa    | 5.72         | 11.16        |              |              |
| AgInSe <sub>2</sub> | 0 GPa    | 6.06         | 11.89        | 6.09         | 11.69        |
|                     | 3 GPa    | 5.97         | 11.67        |              |              |
| AgInTe <sub>2</sub> | 0 GPa    | 6.43         | 12.77        | 6.44         | 12.634       |
|                     | 3 GPa    | 6.31         | 12.52        |              |              |

**Table S2.** Calculated bond lengths of Ag-Y and X-Y, and type I and II bond angles of Y-Ag-Y, Y-X-Y, and Ag-Y-X.

|                     | Pressure     | Bond length |             |                |                | Bond angle     |                |                |                |
|---------------------|--------------|-------------|-------------|----------------|----------------|----------------|----------------|----------------|----------------|
|                     |              | Ag-Y        | X-Y         | Y-Ag-Y         | Y-Ag-Y         | Y-X-Y          | Y-X-Y          | Ag-Y-X         | Ag-Y-X         |
|                     |              | (Å)         | (Å)         | (I)            | (II)           | (I)            | (II)           | (I)            | (II)           |
| AgAlS <sub>2</sub>  | 0 GPa        | 2.51        | 2.26        | 117.29°        | 105.71°        | 109.49°        | 109.46°        | 112.91°        | 107.01°        |
|                     | <b>3 GPa</b> | <b>2.47</b> | <b>2.24</b> | <b>117.40°</b> | <b>105.66°</b> | <b>109.94°</b> | <b>109.24°</b> | <b>113.22°</b> | <b>106.92°</b> |
| AgAlSe <sub>2</sub> | 0 GPa        | 2.61        | 2.40        | 116.20°        | 106.21°        | 109.95°        | 109.23°        | 112.77°        | 107.36°        |
|                     | <b>3 GPa</b> | <b>2.57</b> | <b>2.37</b> | <b>116.48°</b> | <b>106.08°</b> | <b>110.50°</b> | <b>108.96°</b> | <b>113.21°</b> | <b>107.18°</b> |
| AgAlTe <sub>2</sub> | 0 GPa        | 2.75        | 2.63        | 113.03°        | 107.72°        | 109.79°        | 109.31°        | 111.33°        | 108.42°        |
|                     | <b>3 GPa</b> | <b>2.69</b> | <b>2.59</b> | <b>113.12°</b> | <b>107.68°</b> | <b>110.08°</b> | <b>109.17°</b> | <b>111.53°</b> | <b>108.34°</b> |
| AgGaS <sub>2</sub>  | 0 GPa        | 2.50        | 2.29        | 116.70°        | 105.98°        | 110.07°        | 109.17°        | 113.04°        | 107.17°        |
|                     | <b>3 GPa</b> | <b>2.46</b> | <b>2.26</b> | <b>116.97°</b> | <b>105.86°</b> | <b>110.62°</b> | <b>108.90°</b> | <b>113.47°</b> | <b>107.00°</b> |
| AgGaSe <sub>2</sub> | 0 GPa        | 2.60        | 2.43        | 115.43°        | 106.57°        | 110.21°        | 109.11°        | 112.61°        | 107.59°        |
|                     | <b>3 GPa</b> | <b>2.56</b> | <b>2.39</b> | <b>115.85°</b> | <b>106.38°</b> | <b>110.83°</b> | <b>108.80°</b> | <b>113.14°</b> | <b>107.35°</b> |
| AgGaTe <sub>2</sub> | 0 GPa        | 2.73        | 2.64        | 112.60°        | 107.93°        | 109.79°        | 109.31°        | 111.14°        | 108.55°        |
|                     | <b>3 GPa</b> | <b>2.68</b> | <b>2.59</b> | <b>112.80°</b> | <b>107.83°</b> | <b>110.09°</b> | <b>109.16°</b> | <b>111.39°</b> | <b>108.43°</b> |
| AgInS <sub>2</sub>  | 0 GPa        | 2.51        | 2.48        | 111.18°        | 108.62°        | 110.24°        | 109.09°        | 110.70°        | 108.85°        |
|                     | <b>3 GPa</b> | <b>2.46</b> | <b>2.45</b> | <b>111.06°</b> | <b>108.68°</b> | <b>110.54°</b> | <b>108.94°</b> | <b>110.80°</b> | <b>108.81°</b> |
| AgInSe <sub>2</sub> | 0 GPa        | 2.60        | 2.61        | 110.49°        | 108.96°        | 110.58°        | 108.92°        | 110.54°        | 108.94°        |
|                     | <b>3 GPa</b> | <b>2.56</b> | <b>2.57</b> | <b>110.46°</b> | <b>108.98°</b> | <b>110.90°</b> | <b>108.76°</b> | <b>110.68°</b> | <b>108.87°</b> |
| AgInTe <sub>2</sub> | 0 GPa        | 2.74        | 2.81        | 108.89°        | 109.76         | 110.82         | 108.80         | 109.83°        | 109.25°        |
|                     | <b>3 GPa</b> | <b>2.69</b> | <b>2.76</b> | <b>108.80°</b> | <b>109.81</b>  | <b>110.98</b>  | <b>108.72</b>  | <b>109.86°</b> | <b>109.22°</b> |

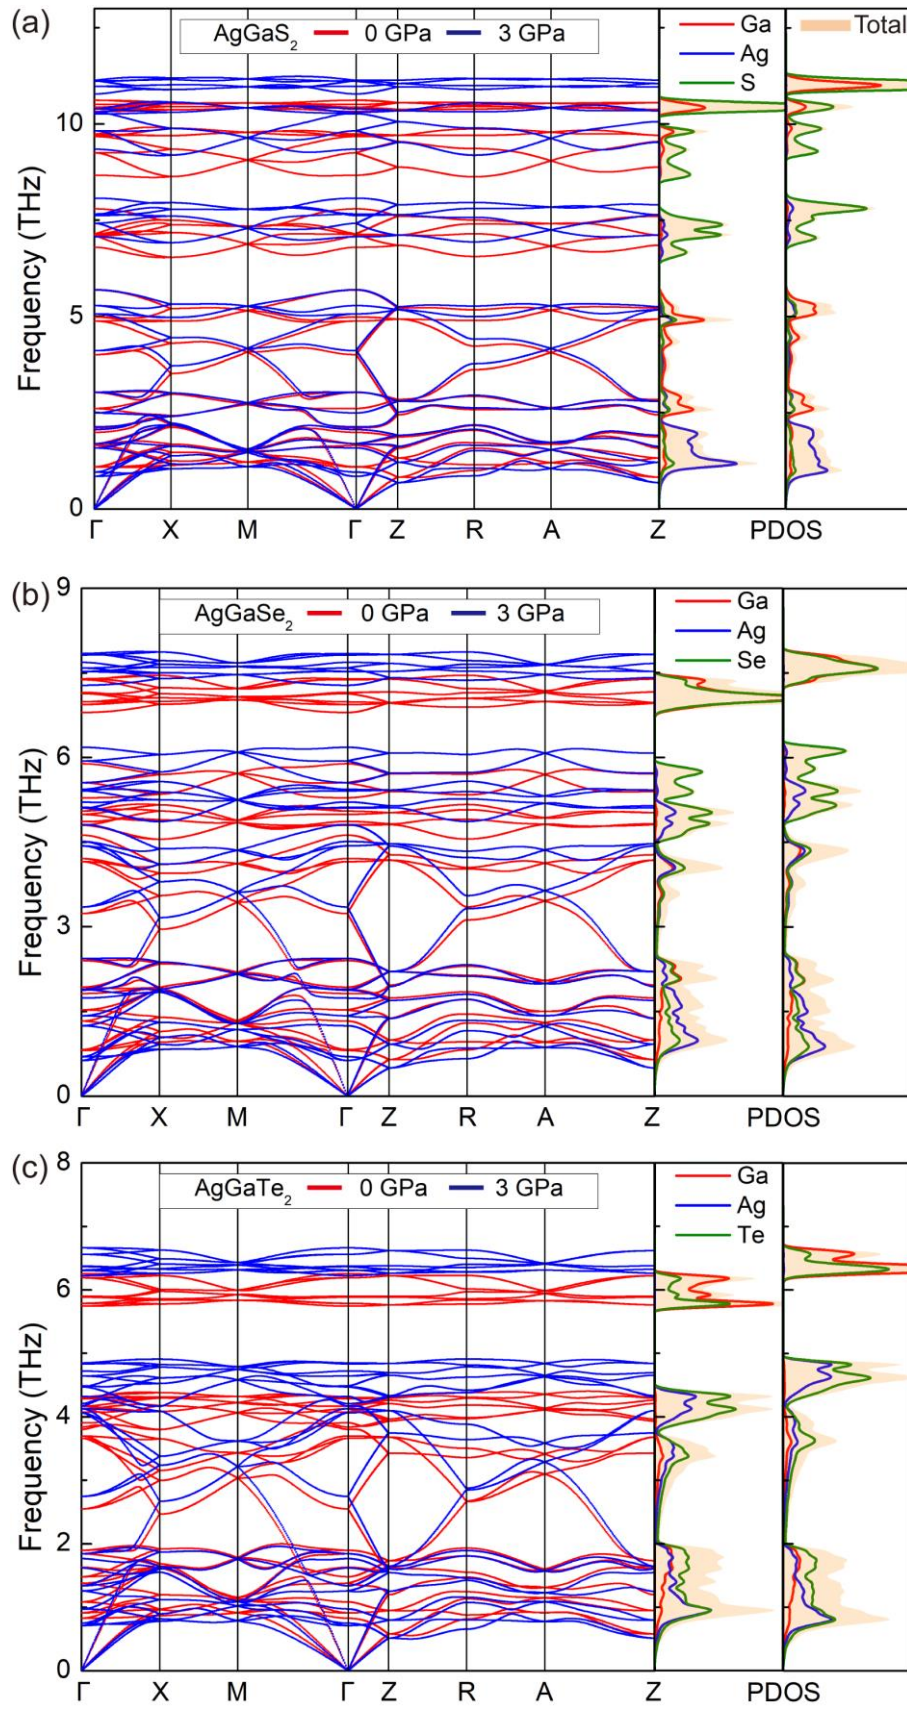

**Figure S1.** Phonon dispersions and atom-decomposed density of states (PDOS) of (a) AgGaS<sub>2</sub>, (b) AgGaSe<sub>2</sub>, and (c) AgGaTe<sub>2</sub>.

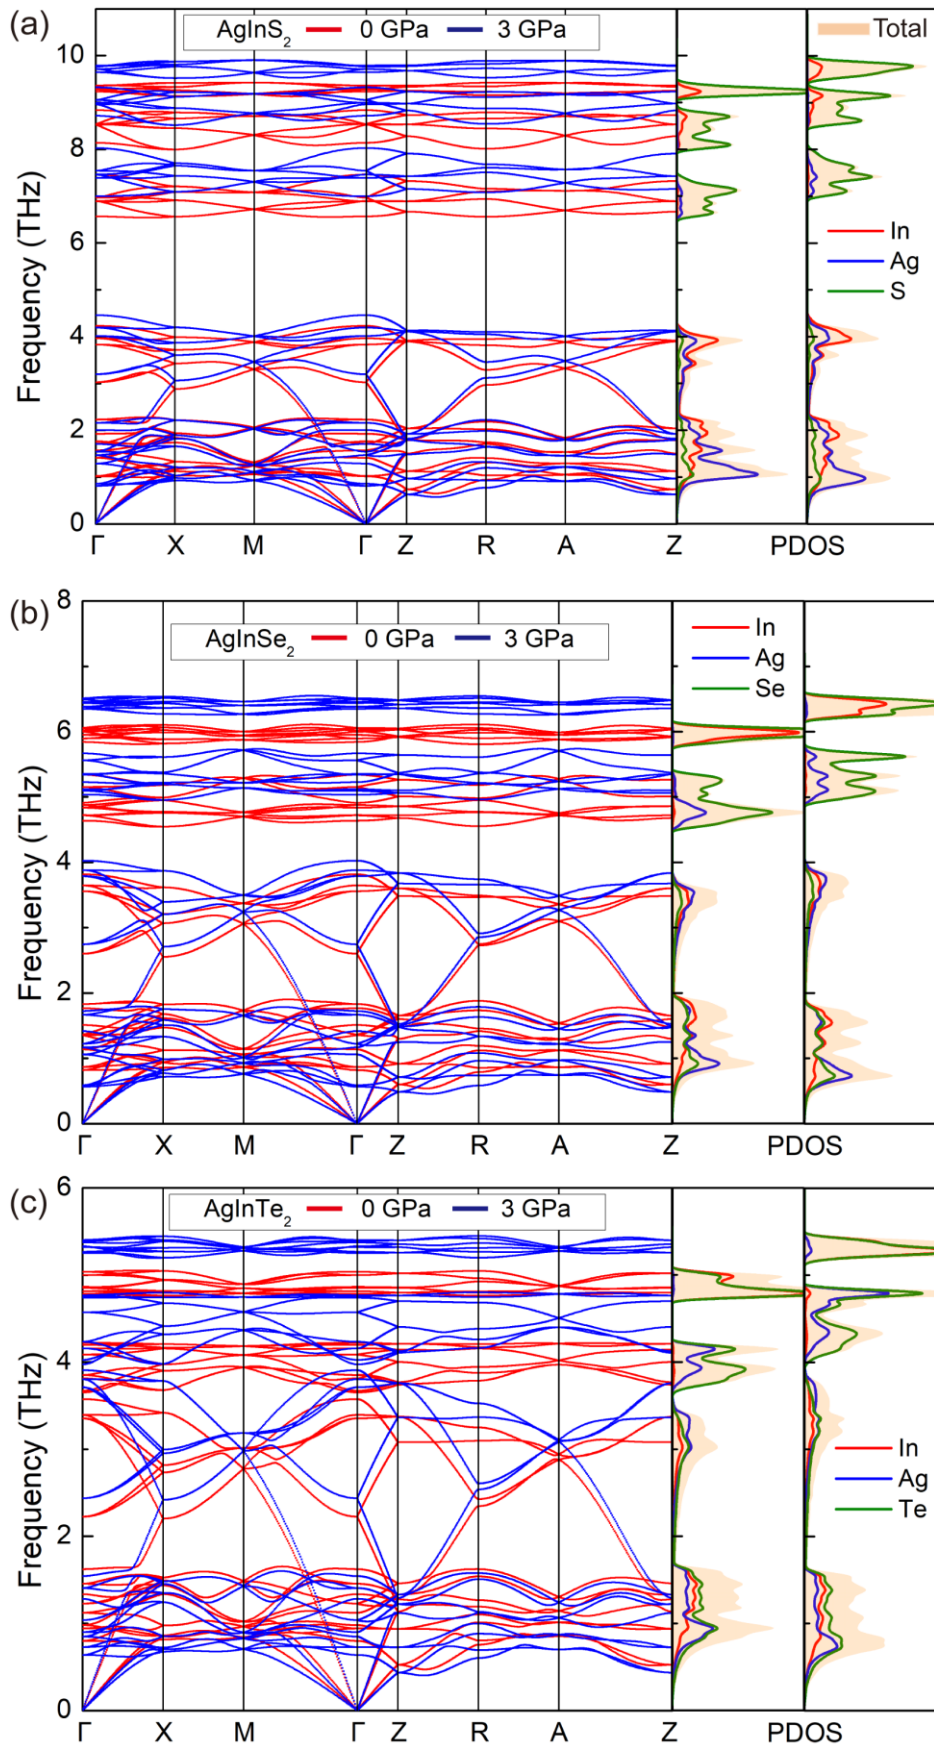

**Figure S2.** Phonon dispersions and atom-decomposed density of states (PDOS) of (a) AgInS<sub>2</sub>, (b) AgInSe<sub>2</sub>, and (c) AgInTe<sub>2</sub>.

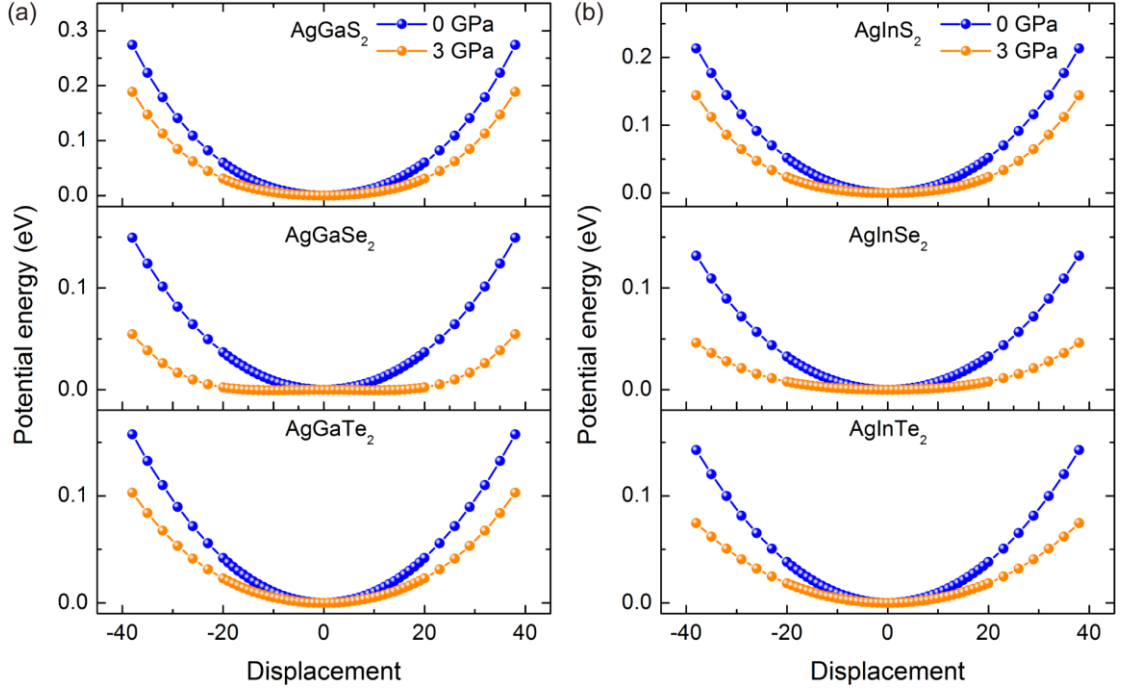

**Figure S3.** Potential energy variation as a function of displacement for lowest transverse optical mode at the  $\Gamma$  point for (a) AgGaS<sub>2</sub>, AgGaSe<sub>2</sub>, and AgGaTe<sub>2</sub>, and (b) for AgInS<sub>2</sub>, AgInSe<sub>2</sub>, and AgInTe<sub>2</sub>.

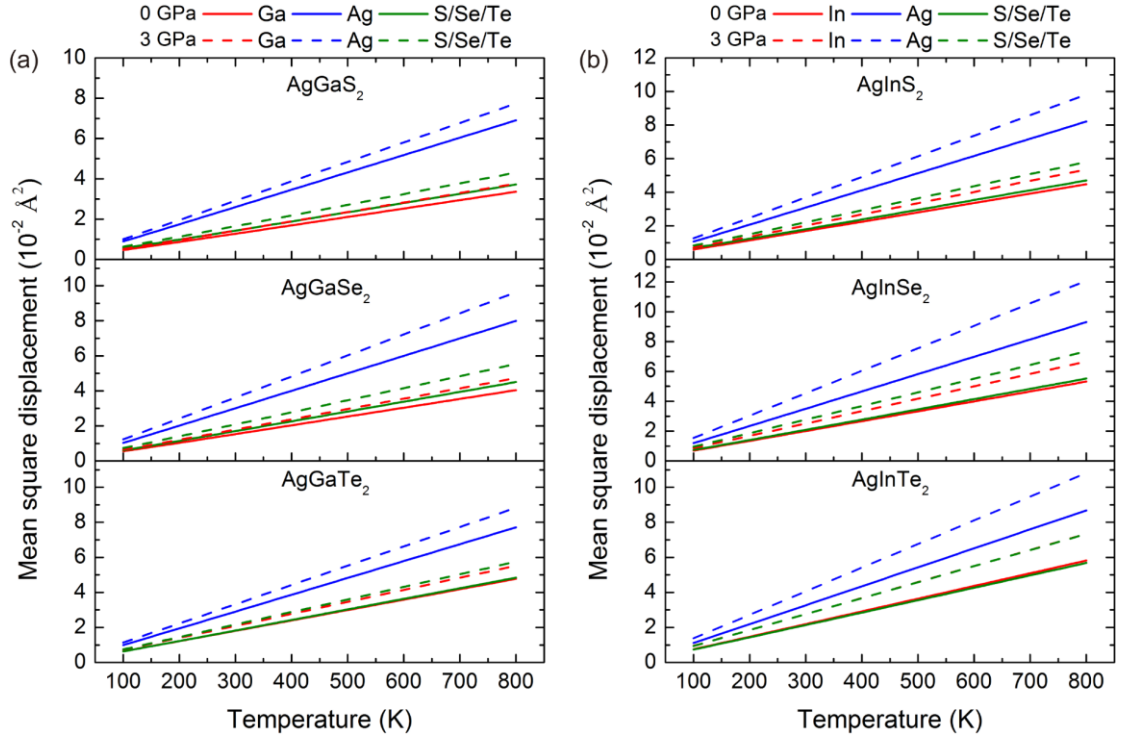

**Figure S4.** Temperature-dependent mean square displacement for (a) AgGaS<sub>2</sub>, AgGaSe<sub>2</sub>, and AgGaTe<sub>2</sub>, and (b) for AgInS<sub>2</sub>, AgInSe<sub>2</sub>, and AgInTe<sub>2</sub>.

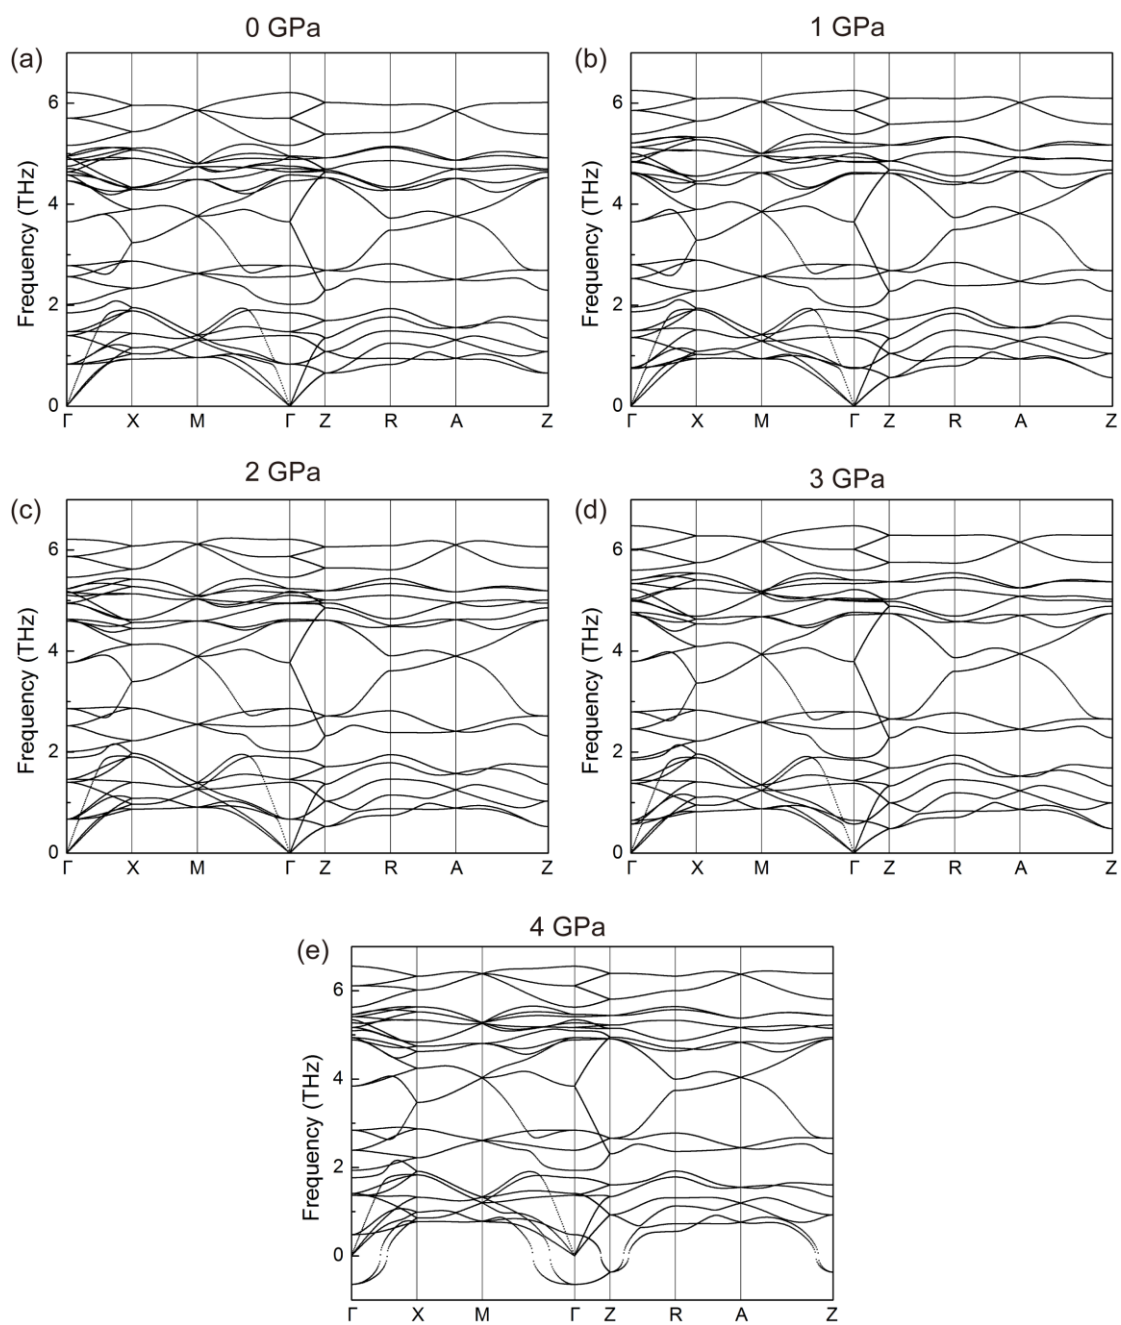

**Figure S5.** Pressure-dependent phonon dispersions of  $\text{AgAlSe}_2$ . (a) 0 GPa, (b) 1 GPa, (c) 2 GPa, (d) 3 GPa, and (e) 4 GPa.



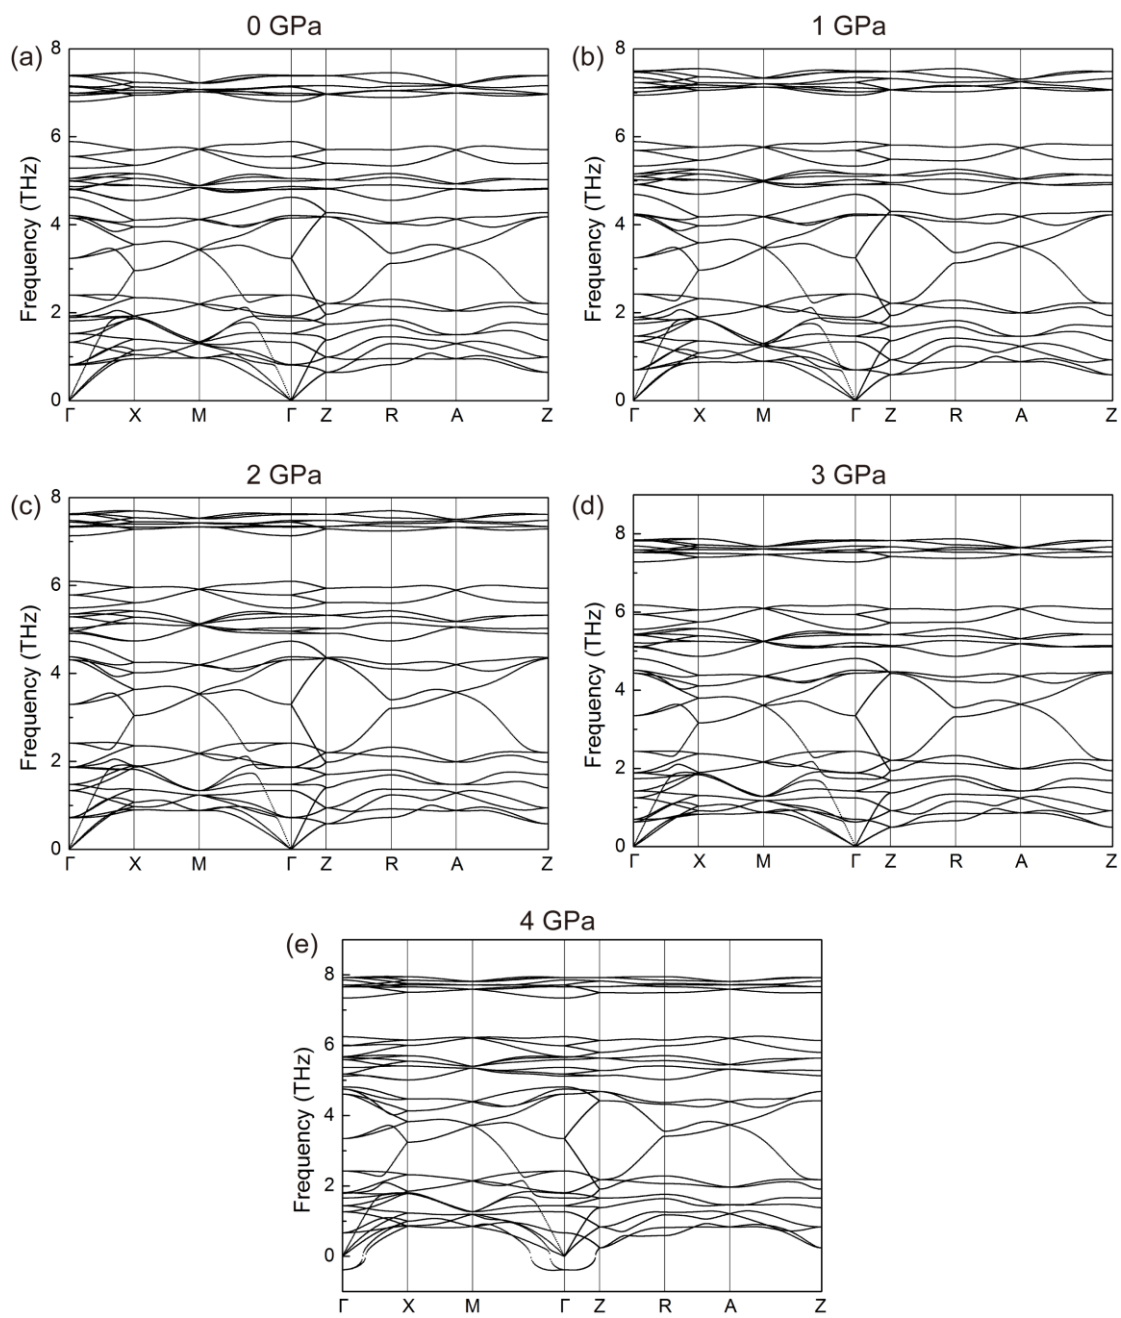

**Figure S6.** Pressure-dependent phonon dispersions of AgGaSe<sub>2</sub>. (a) 0 GPa, (b) 1 GPa, (c) 2 GPa, (d) 3 GPa, and (e) 4 GPa.

**Table S3.** The calculated thermal conductivity compared with experimental and simulation results. The calculated thermal conductivity is averaged over three directions.

|                     | Thermal conductivity (W/mK) |                   |                         |
|---------------------|-----------------------------|-------------------|-------------------------|
|                     | This work                   | Experiment        | Simulation <sup>2</sup> |
| AgAlS <sub>2</sub>  | 1.71                        | -                 | 2.03                    |
| AgAlSe <sub>2</sub> | 1.33                        | -                 | 0.94                    |
| AgAlTe <sub>2</sub> | 2.25                        | -                 | 1.46                    |
| AgGaS <sub>2</sub>  | 2.24                        | 1.4 <sup>3</sup>  | 2.23                    |
| AgGaSe <sub>2</sub> | 1.33                        | 1.2 <sup>4</sup>  | 0.77                    |
| AgGaTe <sub>2</sub> | 2.60                        | 1.94 <sup>5</sup> | 1.43                    |
| AgInS <sub>2</sub>  | 2.35                        | -                 | 2.05                    |
| AgInSe <sub>2</sub> | 1.92                        | 1.1 <sup>6</sup>  | 0.89                    |
| AgInTe <sub>2</sub> | 2.48                        | 2.05 <sup>5</sup> | 1.69                    |

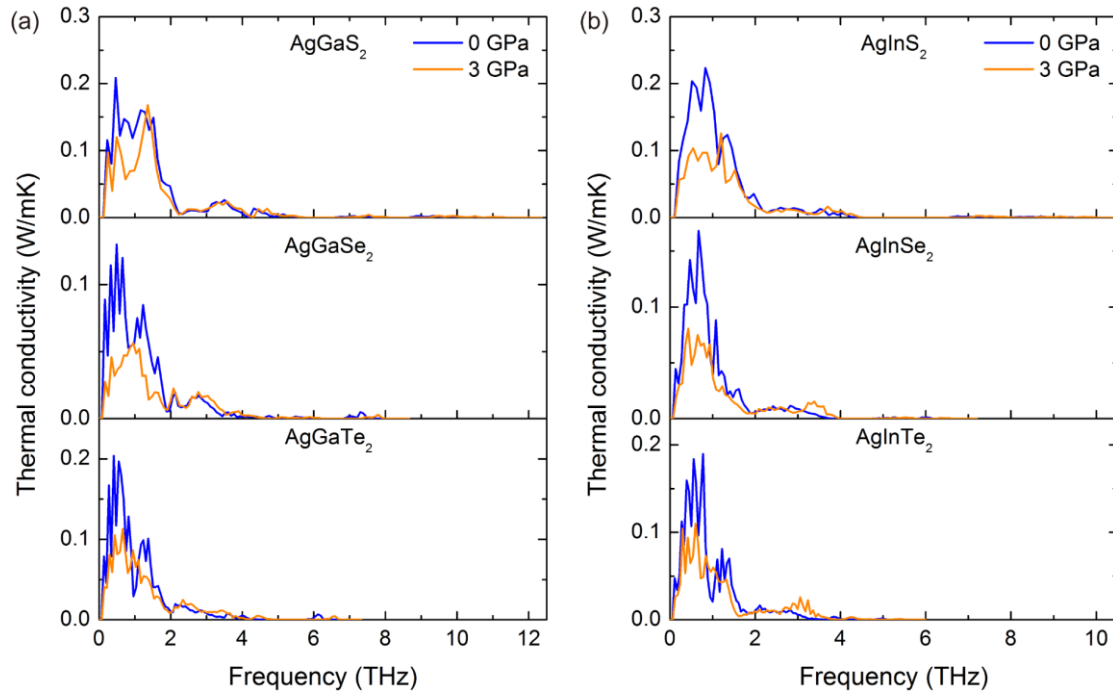

**Figure S7.** Frequency decomposed thermal conductivity for (a) AgGaS<sub>2</sub>, AgGaSe<sub>2</sub>, and AgGaTe<sub>2</sub>, and (b) for AgInS<sub>2</sub>, AgInSe<sub>2</sub>, and AgInTe<sub>2</sub> at 0 GPa and 3 GPa.



**Table S4.** The percentage contribution of phonons in different frequency ranges to thermal conductivity.

|                     | Percentage contribution (%) |       |         |       |
|---------------------|-----------------------------|-------|---------|-------|
|                     | 0-2 THz                     |       | 0-1 THz |       |
|                     | 0 GPa                       | 3 GPa | 0 GPa   | 3 GPa |
| AgAlS <sub>2</sub>  | 77.86                       | 72.73 | 41.87   | 34.35 |
| AgAlSe <sub>2</sub> | 81.02                       | 70.64 | 54.31   | 50.65 |
| AgAlTe <sub>2</sub> | 83.73                       | 81.55 | 59.86   | 58.81 |
| AgGaS <sub>2</sub>  | 85.33                       | 79.83 | 47.97   | 40.70 |
| AgGaSe <sub>2</sub> | 85.46                       | 74.54 | 53.08   | 46.94 |
| AgGaTe <sub>2</sub> | 88.98                       | 81.65 | 61.14   | 58.76 |
| AgInS <sub>2</sub>  | 90.30                       | 84.91 | 62.95   | 53.05 |
| AgInSe <sub>2</sub> | 90.41                       | 81.52 | 70.23   | 64.65 |
| AgInTe <sub>2</sub> | 91.38                       | 82.65 | 67.91   | 63.54 |

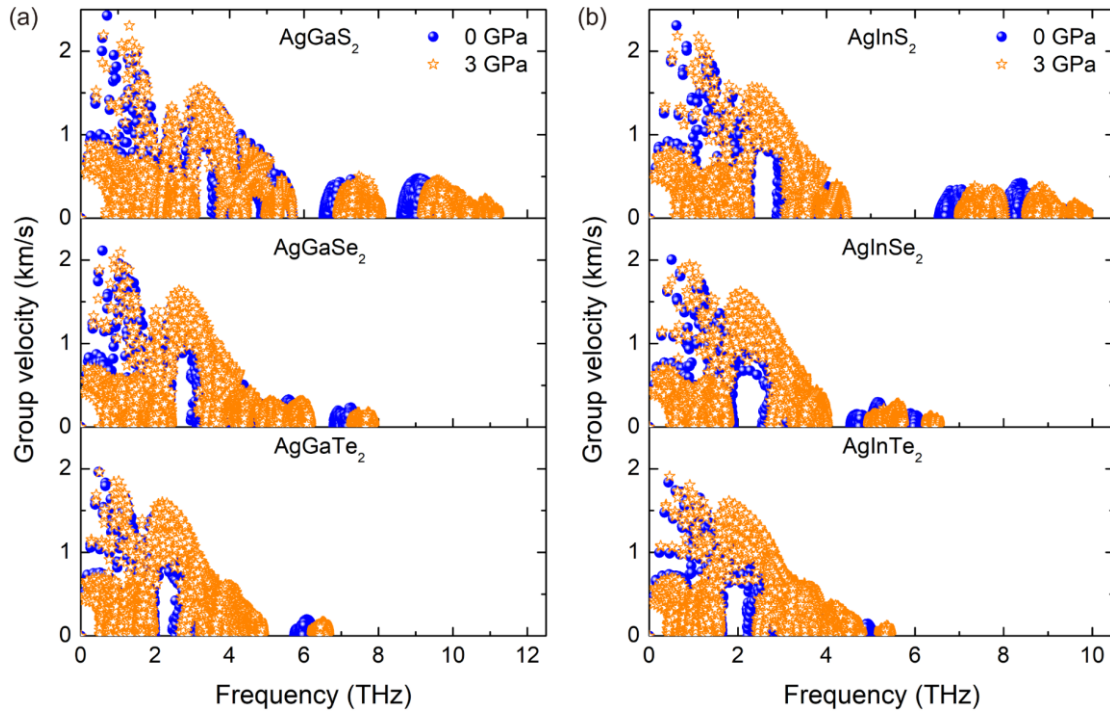

**Figure S8.** Phonon group velocity for (a) AgGaS<sub>2</sub>, AgGaSe<sub>2</sub>, and AgGaTe<sub>2</sub>, and (b) for AgInS<sub>2</sub>, AgInSe<sub>2</sub>, and AgInTe<sub>2</sub> at 0 GPa and 3 GPa.

**Table S5.** Calculated group velocities of transverse acoustic (TA) and longitudinal acoustic (LA) phonons around the  $\Gamma$  point for two representative pressures.

|                     | Pressure                                                | $\Gamma$ -X        |                    |                   | $\Gamma$ -Z        |                    |                   |
|---------------------|---------------------------------------------------------|--------------------|--------------------|-------------------|--------------------|--------------------|-------------------|
|                     |                                                         | $v_{TA1}$<br>(m/s) | $v_{TA2}$<br>(m/s) | $v_{LA}$<br>(m/s) | $v_{TA1}$<br>(m/s) | $v_{TA1}$<br>(m/s) | $v_{LA}$<br>(m/s) |
| AgAlS <sub>2</sub>  | 0 GPa                                                   | 2062               | 2581               | 4830              | 2062               | 2062               | 4625              |
|                     | 3 GPa                                                   | 1510               | 2312               | 5117              | 1510               | 1510               | 4793              |
|                     | $(v_{3\text{GPa}}-v_{0\text{GPa}})/v_{0\text{GPa}}$ (%) | -26.75             | -10.43             | 5.94              | -26.75             | -26.75             | 3.64              |
| AgAlSe <sub>2</sub> | 0 GPa                                                   | 1775               | 1962               | 3990              | 1775               | 1775               | 3767              |
|                     | 3 GPa                                                   | 1360               | 1825               | 4082              | 1360               | 1360               | 3841              |
|                     | $(v_{3\text{GPa}}-v_{0\text{GPa}})/v_{0\text{GPa}}$ (%) | -23.42             | -6.98              | 2.31              | -23.42             | -23.42             | 1.98              |
| AgAlTe <sub>2</sub> | 0 GPa                                                   | 1629               | 1665               | 3456              | 1629               | 1629               | 3357              |
|                     | 3 GPa                                                   | 1482               | 1562               | 3702              | 1482               | 1482               | 3570              |
|                     | $(v_{3\text{GPa}}-v_{0\text{GPa}})/v_{0\text{GPa}}$ (%) | -9.07              | -6.17              | 7.11              | -9.07              | -9.07              | 6.33              |
| AgGaS <sub>2</sub>  | 0 GPa                                                   | 1996               | 2257               | 4371              | 1996               | 1996               | 4175              |
|                     | 3 GPa                                                   | 1591               | 2119               | 4614              | 1591               | 1591               | 4375              |
|                     | $(v_{3\text{GPa}}-v_{0\text{GPa}})/v_{0\text{GPa}}$ (%) | -20.29             | -6.12              | 5.55              | -20.29             | -20.29             | 4.79              |
| AgGaSe <sub>2</sub> | 0 GPa                                                   | 1684               | 1901               | 3738              | 1684               | 1684               | 3573              |
|                     | 3 GPa                                                   | 1222               | 1653               | 4009              | 1222               | 1222               | 3702              |
|                     | $(v_{3\text{GPa}}-v_{0\text{GPa}})/v_{0\text{GPa}}$ (%) | -27.45             | -13.07             | 7.25              | -27.45             | -27.45             | 3.61              |
| AgGaTe <sub>2</sub> | 0 GPa                                                   | 1492               | 1591               | 3304              | 1492               | 1492               | 3187              |
|                     | 3 GPa                                                   | 1289               | 1478               | 3470              | 1289               | 1289               | 3372              |
|                     | $(v_{3\text{GPa}}-v_{0\text{GPa}})/v_{0\text{GPa}}$ (%) | -13.61             | -7.70              | 5.03              | -13.61             | -13.61             | 5.80              |
| AgInS <sub>2</sub>  | 0 GPa                                                   | 1819               | 1830               | 3878              | 1819               | 1819               | 3788              |
|                     | 3 GPa                                                   | 1563               | 1657               | 4086              | 1563               | 1563               | 3974              |
|                     | $(v_{3\text{GPa}}-v_{0\text{GPa}})/v_{0\text{GPa}}$ (%) | -14.09             | -9.43              | 5.38              | -14.09             | -14.09             | 4.91              |
| AgInSe <sub>2</sub> | 0 GPa                                                   | 1523               | 1535               | 3318              | 1535               | 1535               | 3294              |
|                     | 3 GPa                                                   | 1329               | 1373               | 3461              | 1373               | 1373               | 3420              |
|                     | $(v_{3\text{GPa}}-v_{0\text{GPa}})/v_{0\text{GPa}}$ (%) | -12.74             | -10.51             | 4.30              | -10.51             | -10.51             | 3.83              |
| AgInTe <sub>2</sub> | 0 GPa                                                   | 1418               | 1424               | 2992              | 1418               | 1418               | 3001              |

|                                                             |        |       |      |        |        |      |
|-------------------------------------------------------------|--------|-------|------|--------|--------|------|
| 3 GPa                                                       | 1146   | 1295  | 3209 | 1146   | 1146   | 3244 |
| $(v_{3\text{GPa}} - v_{0\text{GPa}}) / v_{0\text{GPa}}$ (%) | -19.17 | -9.09 | 7.25 | -19.17 | -19.17 | 8.10 |

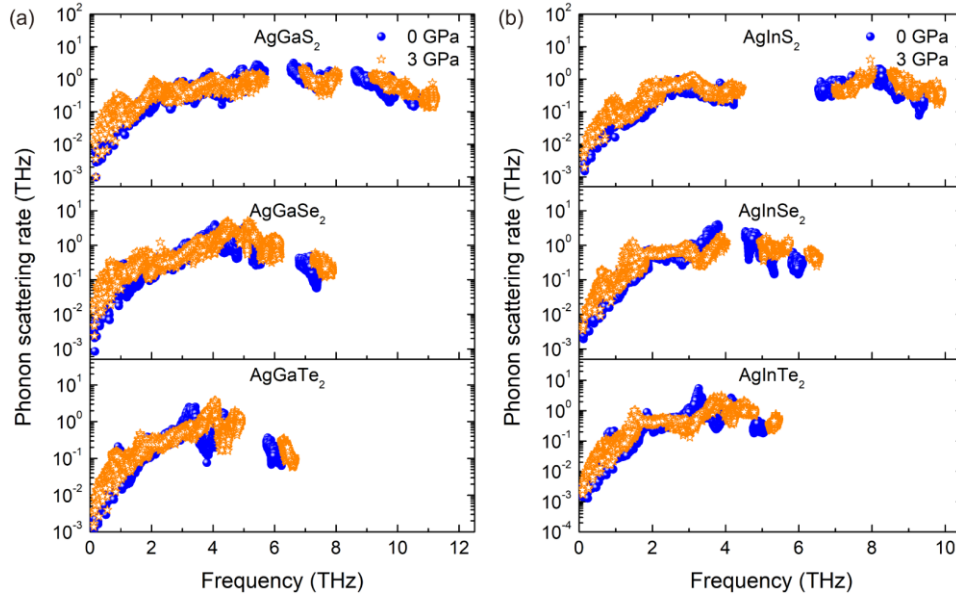

**Figure S9** Phonon scattering rate for (a) AgGaS<sub>2</sub>, AgGaSe<sub>2</sub>, and AgGaTe<sub>2</sub>, and (b) for AgInS<sub>2</sub>, AgInSe<sub>2</sub>, and AgInTe<sub>2</sub> at 0 GPa and 3 GPa.

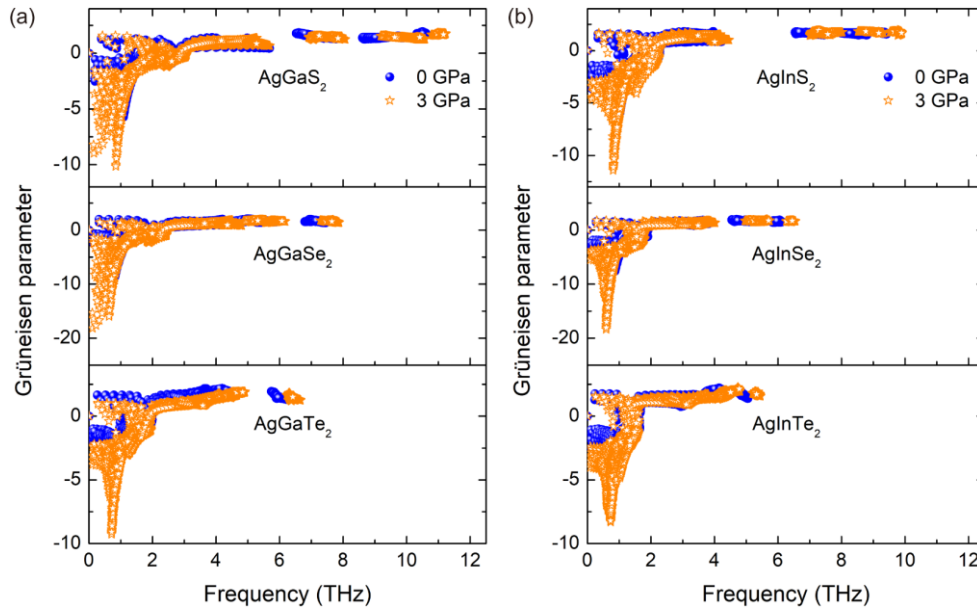

**Figure S10.** Grüneisen parameter for (a) AgGaS<sub>2</sub>, AgGaSe<sub>2</sub>, and AgGaTe<sub>2</sub>, and (b) for AgInS<sub>2</sub>, AgInSe<sub>2</sub>, and AgInTe<sub>2</sub> at 0 GPa and 3 GPa.

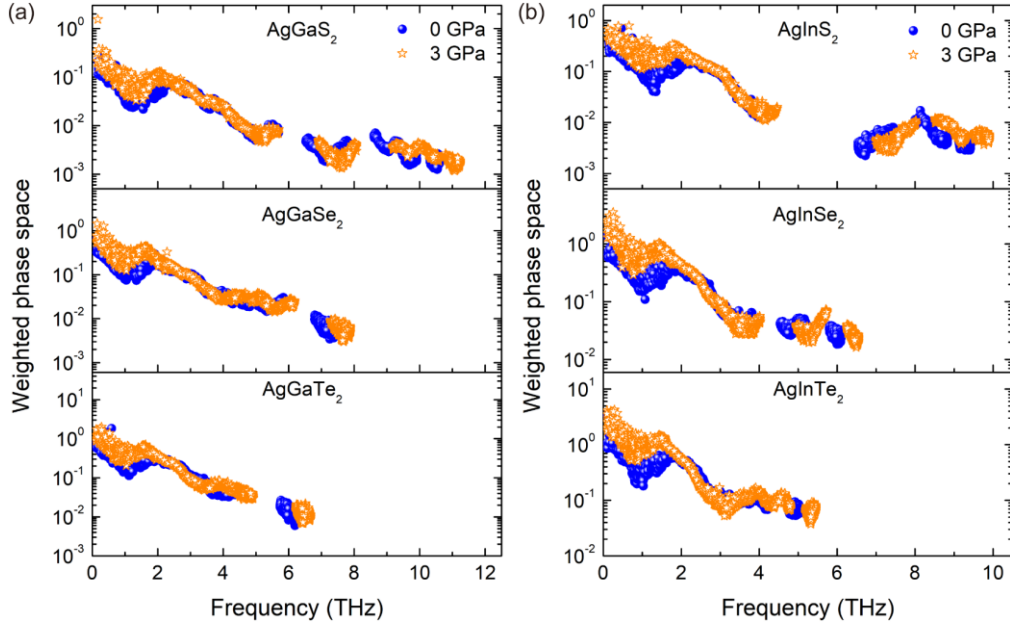

**Figure S11.** Weighted scattering phase space for (a) AgGaS<sub>2</sub>, AgGaSe<sub>2</sub>, and AgGaTe<sub>2</sub>, and (b) for AgInS<sub>2</sub>, AgInSe<sub>2</sub>, and AgInTe<sub>2</sub> at 0 GPa and 3 GPa.

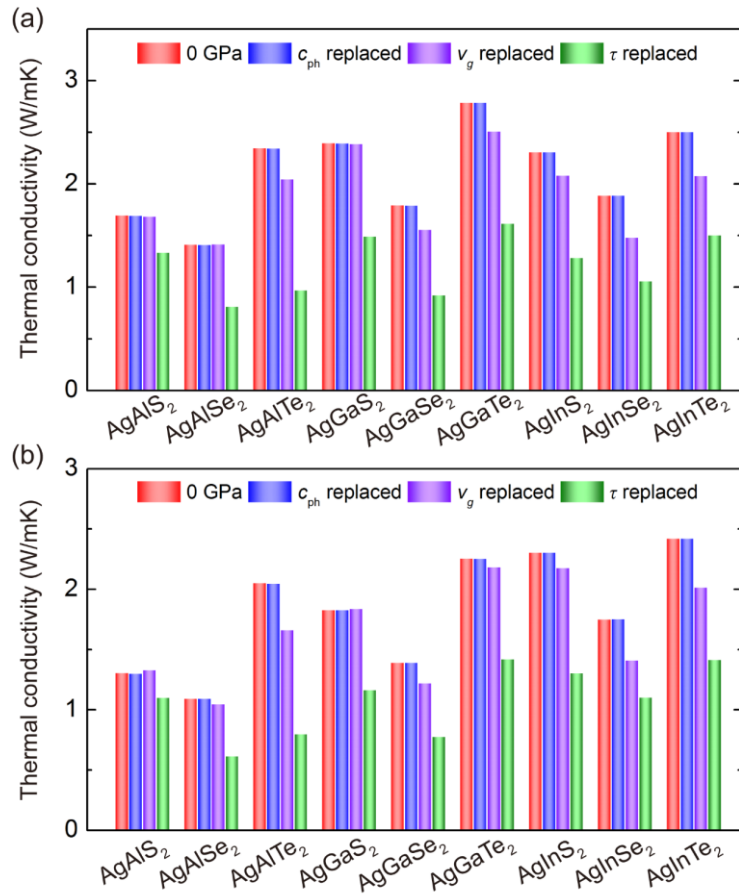

**Figure S12.** Cross-calculated thermal conductivity along the (a)  $a/b$  and (b)  $c$  axis with phonon specific heat  $c_{ph}$ , group velocity  $v_g$ , and relaxation time  $\tau$  replaced with high-pressure values.

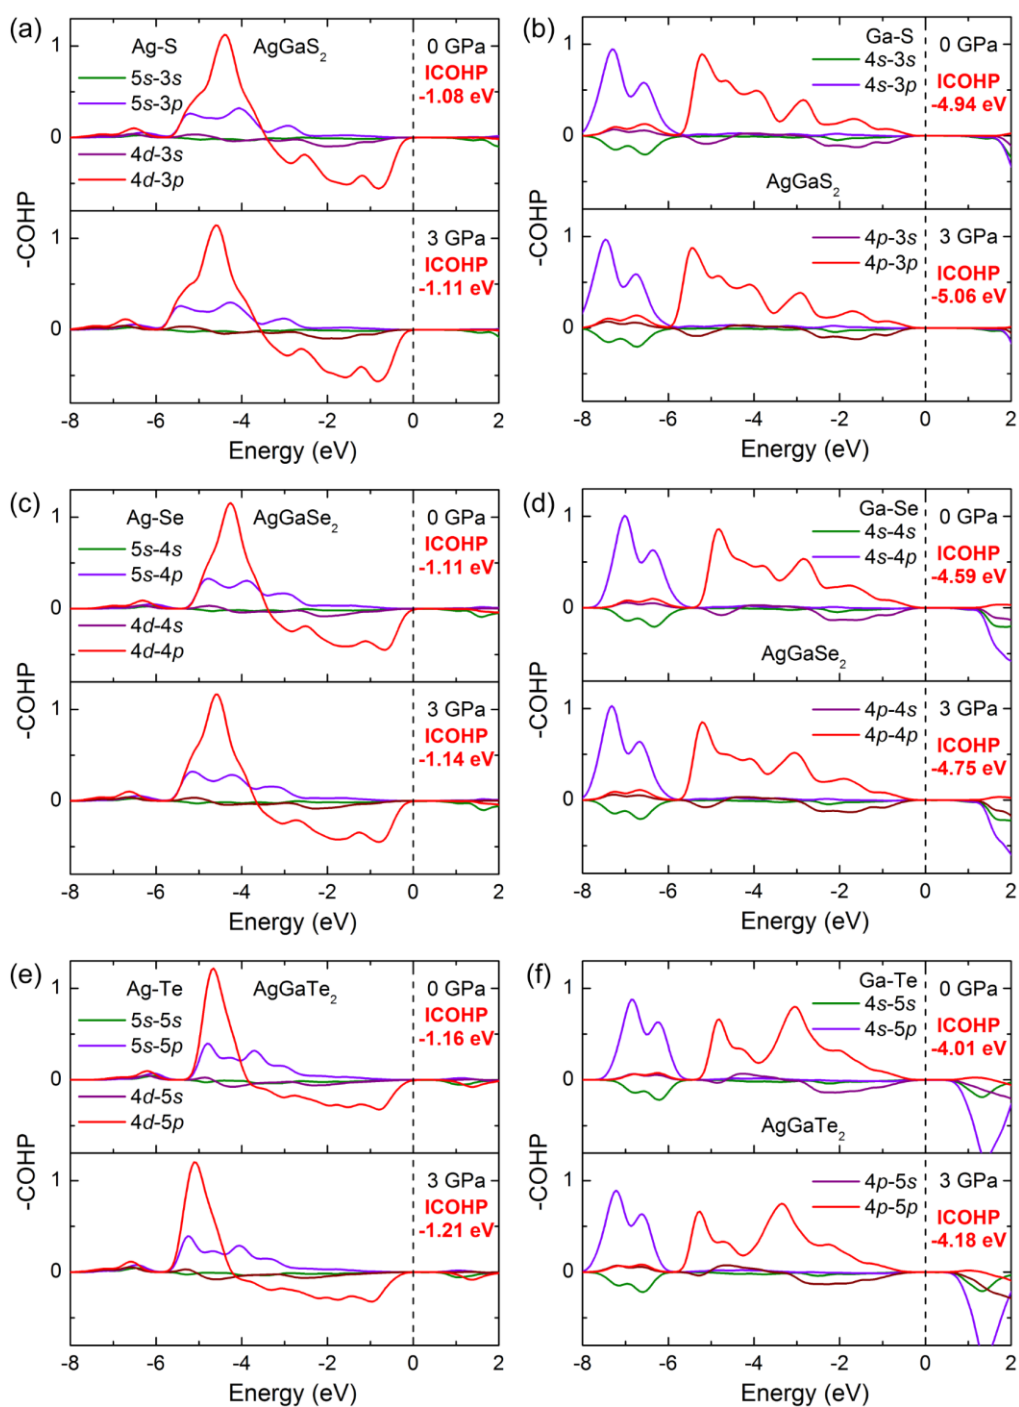

**Figure S13.** The calculated COHP for the Ag-Y and Ga-Y bonds of AgGaS<sub>2</sub>, AgGaSe<sub>2</sub>, and AgGaTe<sub>2</sub> at 0 GPa and 3 GPa. (a) Ag-S, (b) Ga-S, (c) Ag-Se, (d) Ga-Se, (e) Ag-Te, and (f) Ga-Te.

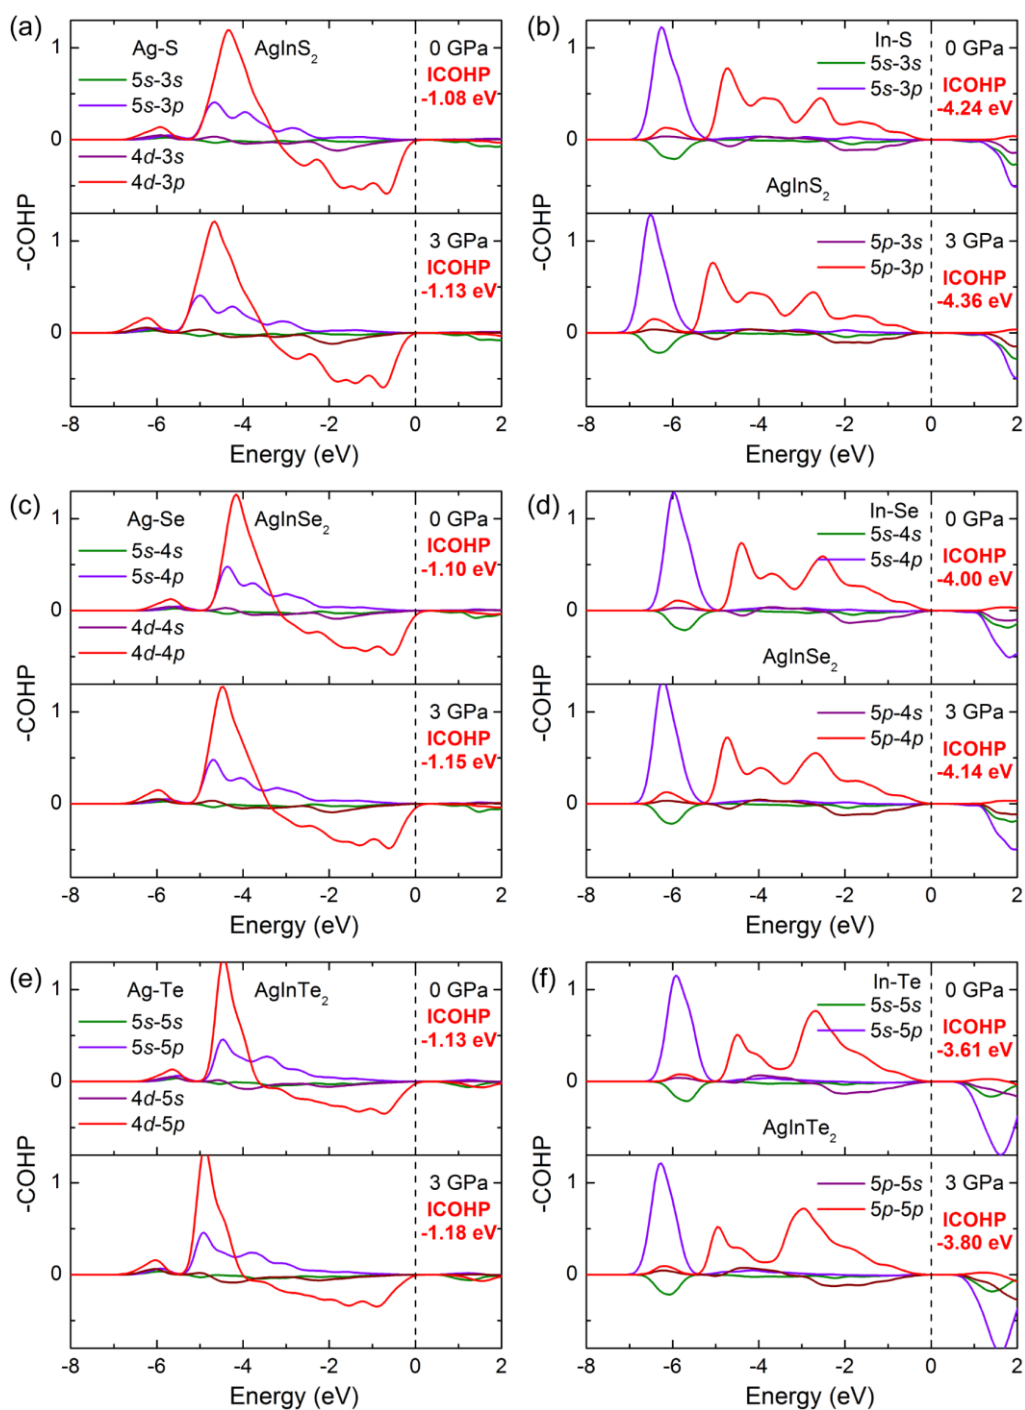

**Figure S14.** The calculated COHP for the Ag-Y and In-Y bonds of AgInS<sub>2</sub>, AgInSe<sub>2</sub>, and AgInTe<sub>2</sub> at 0 GPa and 3 GPa. (a) Ag-S, (b) In-S, (c) Ag-Se, (d) In-Se, (e) Ag-Te, and (f) In-Te.



**Table S6.** The transferred and shared electrons between atoms in  $\text{AgXY}_2$  ( $X = \text{Al, Ga, In; Y = S, Se, Te}$ ).

|                     | Pressure | Transferred electron  e |                  |                 | Shared electron  e  |                                    |
|---------------------|----------|-------------------------|------------------|-----------------|---------------------|------------------------------------|
|                     |          | Ag                      | $X^{\text{III}}$ | $Y^{\text{VI}}$ | Ag- $Y^{\text{VI}}$ | $X^{\text{III}}$ - $Y^{\text{VI}}$ |
| AgAlS <sub>2</sub>  | 0 GPa    | 0.424                   | 1.102            | -0.763          | 0.884               | 1.002                              |
|                     | 3 GPa    | 0.438                   | 1.114            | -0.776          | 0.926               | 1.016                              |
| AgAlSe <sub>2</sub> | 0 GPa    | 0.352                   | 0.904            | -0.628          | 0.891               | 1.023                              |
|                     | 3 GPa    | 0.365                   | 0.923            | -0.644          | 0.939               | 1.041                              |
| AgAlTe <sub>2</sub> | 0 GPa    | 0.225                   | 0.606            | -0.415          | 0.971               | 1.055                              |
|                     | 3 GPa    | 0.238                   | 0.633            | -0.435          | 1.031               | 0.082                              |
| AgGaS <sub>2</sub>  | 0 GPa    | 0.367                   | 0.806            | -0.587          | 0.904               | 1.070                              |
|                     | 3 GPa    | 0.378                   | 0.811            | -0.594          | 0.944               | 1.097                              |
| AgGaSe <sub>2</sub> | 0 GPa    | 0.290                   | 0.638            | -0.464          | 0.917               | 1.051                              |
|                     | 3 GPa    | 0.297                   | 0.643            | -0.470          | 0.962               | 1.085                              |
| AgGaTe <sub>2</sub> | 0 GPa    | 0.153                   | 0.403            | -0.278          | 1.000               | 1.047                              |
|                     | 3 GPa    | 0.159                   | 0.408            | -0.284          | 1.059               | 1.092                              |
| AgInS <sub>2</sub>  | 0 GPa    | 0.370                   | 0.893            | -0.631          | 0.924               | 1.043                              |
|                     | 3 GPa    | 0.380                   | 0.898            | -0.639          | 0.975               | 1.075                              |
| AgInSe <sub>2</sub> | 0 GPa    | 0.302                   | 0.737            | -0.519          | 0.933               | 1.028                              |
|                     | 3 GPa    | 0.308                   | 0.742            | -0.525          | 0.989               | 1.068                              |
| AgInTe <sub>2</sub> | 0 GPa    | 0.178                   | 0.520            | -0.349          | 1.002               | 1.032                              |
|                     | 3 GPa    | 0.184                   | 0.524            | -0.354          | 1.071               | 1.084                              |

## References

1. Shay, J. L.; Wernick, J. H., Ternary chalcopyrite semiconductors: growth, electronic properties, and applications. Pergamon: Oxford, U.K., 1975.
2. Plata, J. J.; Posligua, V.; Márquez, A. M.; Fernandez Sanz, J.; Grau-Crespo, R., Charting the lattice thermal conductivities of I–III–VI<sub>2</sub> chalcopyrite semiconductors. *Chemistry of Materials* 2022, 34, 2833-2841.
3. Catella, G. C.; Burlage, D., Crystal growth and optical properties of AgGaS<sub>2</sub> and AgGaSe<sub>2</sub>. *MRS Bulletin* 2013, 23, 28-36.
4. Aggarwal, R. L.; Fan, T. Y., Thermal diffusivity, specific heat, thermal conductivity, coefficient of thermal expansion, and refractive-index change with temperature in AgGaSe<sub>2</sub>. *Applied Optics* 2005, 44, 2673-2677.

5. Charoenphakdee, A.; Kurosaki, K.; Muta, H.; Uno, M.; Yamanaka, S., Thermal conductivity of the ternary compounds:  $\text{AgMTe}_2$  and  $\text{AgM}_5\text{Te}_8$  (M = Ga or In). *Materials Transactions* 2009, 50, 1603-1606.
6. Qiu, P.; Qin, Y.; Zhang, Q.; Li, R.; Yang, J.; Song, Q.; Tang, Y.; Bai, S.; Shi, X.; Chen, L., Intrinsically high thermoelectric performance in  $\text{AgInSe}_2$  n-type diamond-like compounds. *Advanced Science* 2018, 5, 1700727.
